# Supplementary material for: Mountains and Chasms - Surveying the Oncogenomic Publication Landscape
Source: Preprints.org preprint supplement (doi:10.20944/preprints201807.0618.v1), 2018-07-31
Supplement: Supplementary file 17 [file supplementary]

Archive with 51 entries (46 files):
- oncogenomic_publication_landscape_LaTex_bundled/
- oncogenomic_publication_landscape_LaTex_bundled/.DS_Store
- __MACOSX/
- __MACOSX/oncogenomic_publication_landscape_LaTex_bundled/
- __MACOSX/oncogenomic_publication_landscape_LaTex_bundled/._.DS_Store
- oncogenomic_publication_landscape_LaTex_bundled/preprintstyle.cls
- __MACOSX/oncogenomic_publication_landscape_LaTex_bundled/._preprintstyle.cls
- oncogenomic_publication_landscape_LaTex_bundled/references.bib
- __MACOSX/oncogenomic_publication_landscape_LaTex_bundled/._references.bib
- oncogenomic_publication_landscape_LaTex_bundled/oncogenomic_publication_landscape.tex
- __MACOSX/oncogenomic_publication_landscape_LaTex_bundled/._oncogenomic_publication_landscape.tex
- oncogenomic_publication_landscape_LaTex_bundled/preprintstyle.bst
- __MACOSX/oncogenomic_publication_landscape_LaTex_bundled/._preprintstyle.bst
- oncogenomic_publication_landscape_LaTex_bundled/figures/
- oncogenomic_publication_landscape_LaTex_bundled/figures/publication_map.tiff
- __MACOSX/oncogenomic_publication_landscape_LaTex_bundled/figures/
- __MACOSX/oncogenomic_publication_landscape_LaTex_bundled/figures/._publication_map.tiff
- oncogenomic_publication_landscape_LaTex_bundled/figures/cumuPlot.svg
- __MACOSX/oncogenomic_publication_landscape_LaTex_bundled/figures/._cumuPlot.svg
- oncogenomic_publication_landscape_LaTex_bundled/figures/TCGA_top50.pdf
- __MACOSX/oncogenomic_publication_landscape_LaTex_bundled/figures/._TCGA_top50.pdf
- oncogenomic_publication_landscape_LaTex_bundled/figures/top50_nolog_label.svg
- __MACOSX/oncogenomic_publication_landscape_LaTex_bundled/figures/._top50_nolog_label.svg
- oncogenomic_publication_landscape_LaTex_bundled/figures/samplenumbersPubs.pdf
- __MACOSX/oncogenomic_publication_landscape_LaTex_bundled/figures/._samplenumbersPubs.pdf
- oncogenomic_publication_landscape_LaTex_bundled/figures/top50_nolog_label.pdf
- __MACOSX/oncogenomic_publication_landscape_LaTex_bundled/figures/._top50_nolog_label.pdf
- oncogenomic_publication_landscape_LaTex_bundled/figures/TCGA_top50.svg
- __MACOSX/oncogenomic_publication_landscape_LaTex_bundled/figures/._TCGA_top50.svg
- oncogenomic_publication_landscape_LaTex_bundled/figures/seer.eps
- __MACOSX/oncogenomic_publication_landscape_LaTex_bundled/figures/._seer.eps
- oncogenomic_publication_landscape_LaTex_bundled/figures/icdtopo.pdf
- __MACOSX/oncogenomic_publication_landscape_LaTex_bundled/figures/._icdtopo.pdf
- oncogenomic_publication_landscape_LaTex_bundled/figures/cumuPlot.pdf
- __MACOSX/oncogenomic_publication_landscape_LaTex_bundled/figures/._cumuPlot.pdf
- oncogenomic_publication_landscape_LaTex_bundled/figures/cum_nolog_label.pdf
- __MACOSX/oncogenomic_publication_landscape_LaTex_bundled/figures/._cum_nolog_label.pdf
- oncogenomic_publication_landscape_LaTex_bundled/figures/seer.pdf
- __MACOSX/oncogenomic_publication_landscape_LaTex_bundled/figures/._seer.pdf
- oncogenomic_publication_landscape_LaTex_bundled/figures/cumuPlot.eps
- __MACOSX/oncogenomic_publication_landscape_LaTex_bundled/figures/._cumuPlot.eps
- oncogenomic_publication_landscape_LaTex_bundled/figures/icdtop-eps-converted-to.pdf
- __MACOSX/oncogenomic_publication_landscape_LaTex_bundled/figures/._icdtop-eps-converted-to.pdf
- oncogenomic_publication_landscape_LaTex_bundled/figures/icdtop.eps
- __MACOSX/oncogenomic_publication_landscape_LaTex_bundled/figures/._icdtop.eps
- oncogenomic_publication_landscape_LaTex_bundled/figures/publication_map.png
- __MACOSX/oncogenomic_publication_landscape_LaTex_bundled/figures/._publication_map.png
- oncogenomic_publication_landscape_LaTex_bundled/figures/cum_nolog_label.svg
- __MACOSX/oncogenomic_publication_landscape_LaTex_bundled/figures/._cum_nolog_label.svg
- __MACOSX/oncogenomic_publication_landscape_LaTex_bundled/._figures
- __MACOSX/._oncogenomic_publication_landscape_LaTex_bundled
