# Supplementary figures and images for: Mountains and Chasms - Surveying the Oncogenomic Publication Landscape
Source: Preprints.org preprint supplement (doi:10.20944/preprints201807.0618.v1), 2018-07-31

Number of samples in ArrayMap database

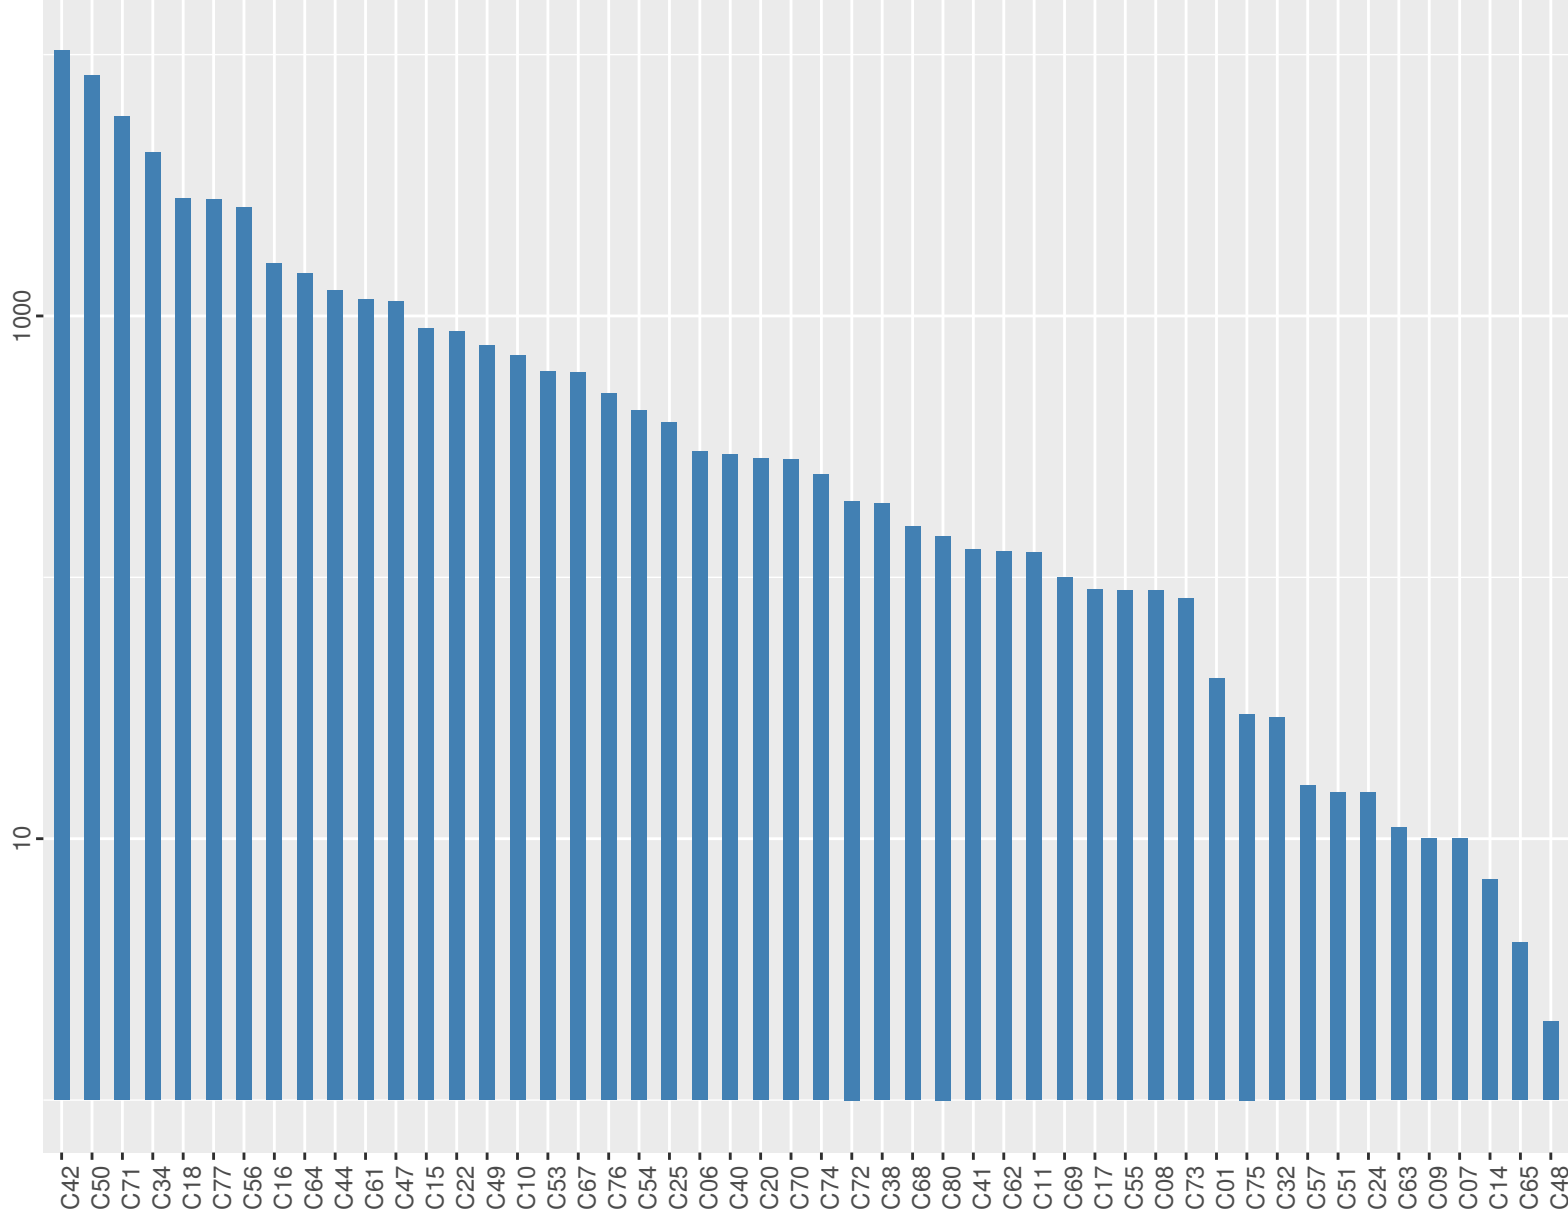

Supplement: Supplementary file 2 [file supplementary]

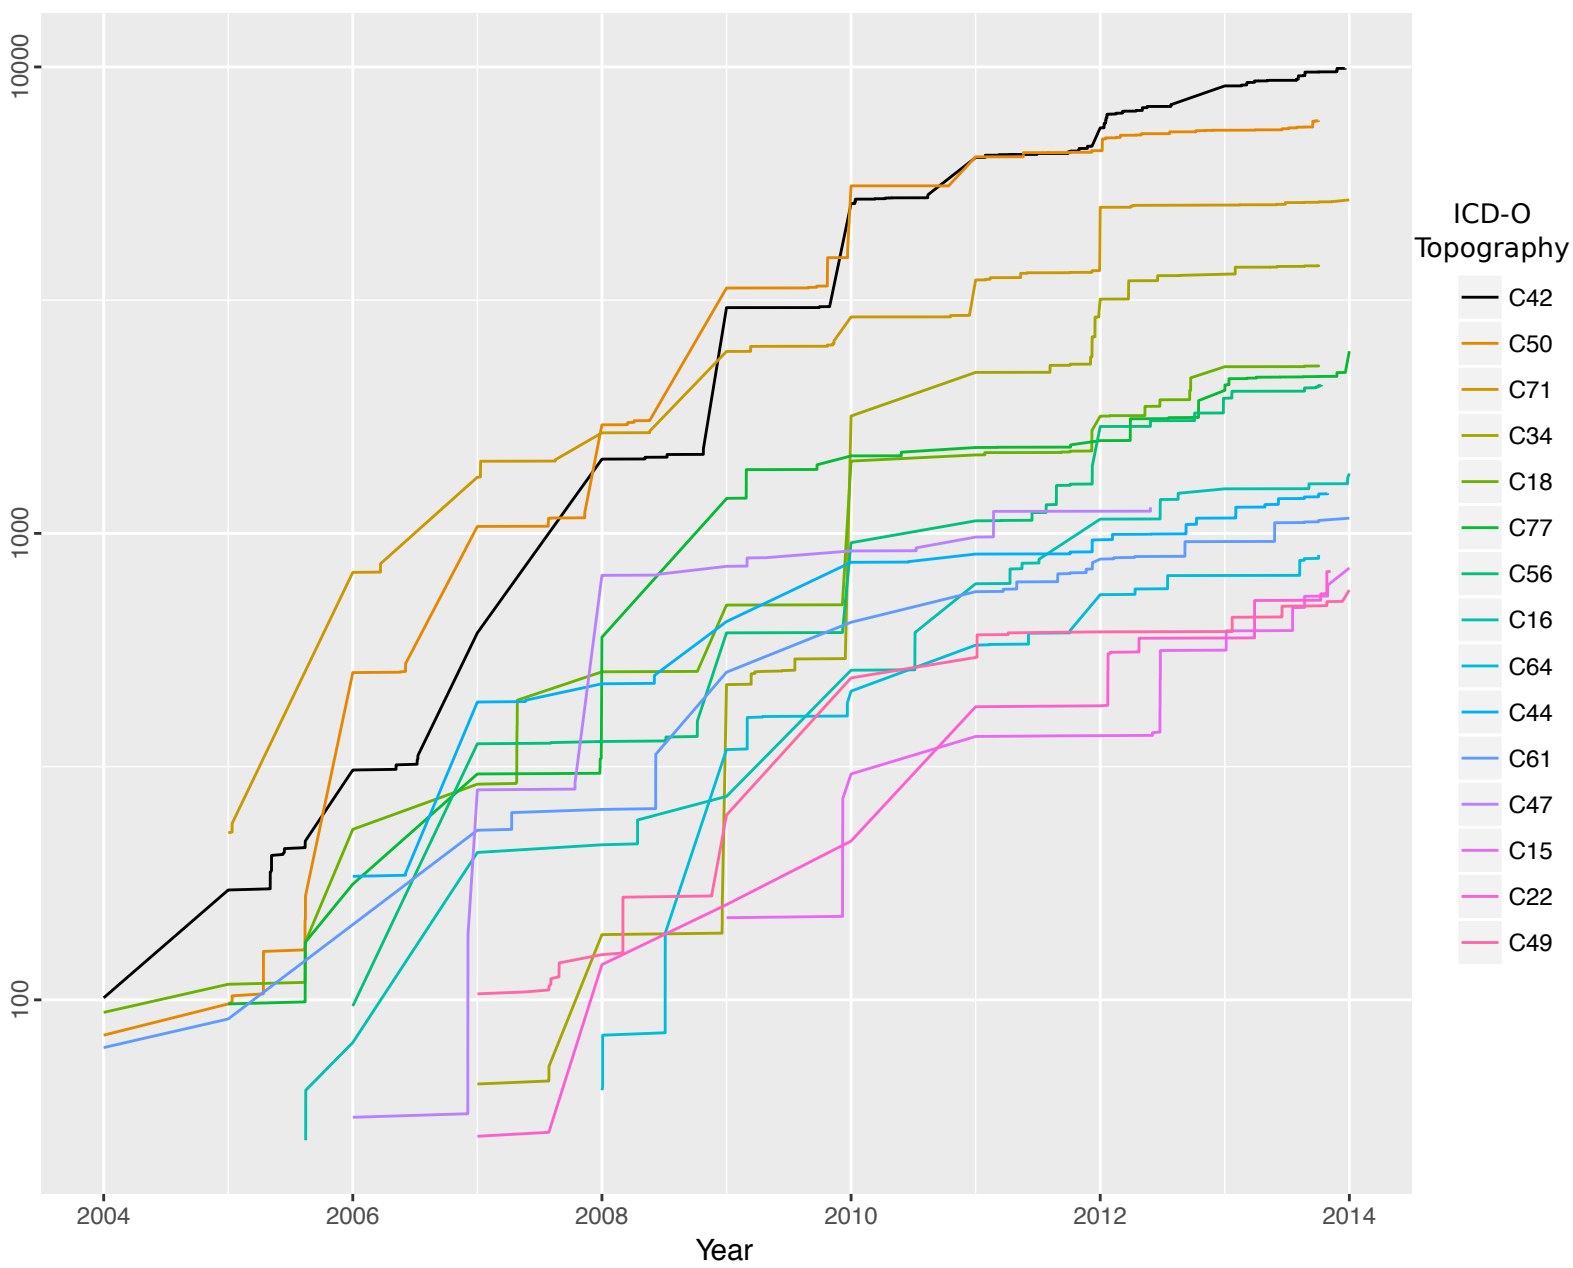

Supplement: Supplementary file 5 [file supplementary]

Cumulative number of samples in ArrayMap database

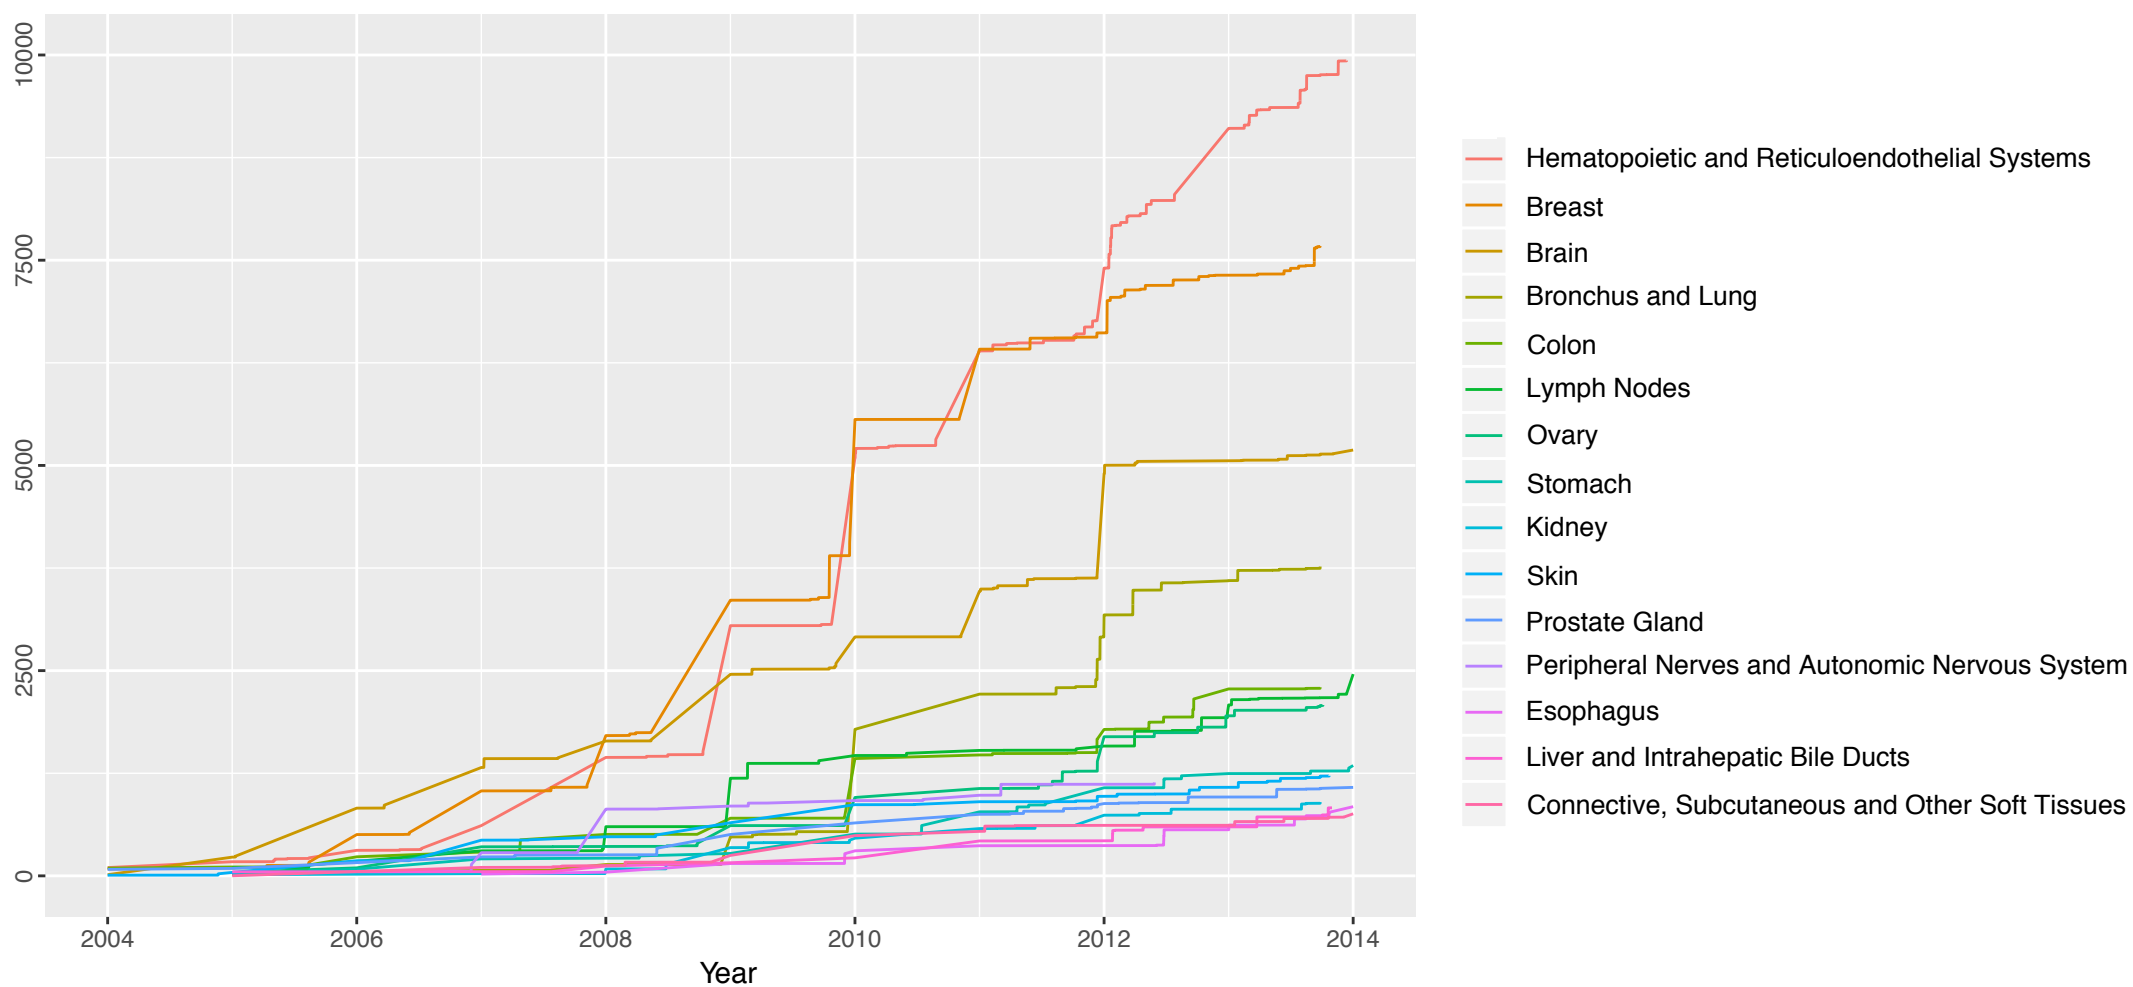

Supplement: Supplementary file 6 [file supplementary]

Number of samples in ArrayMap database

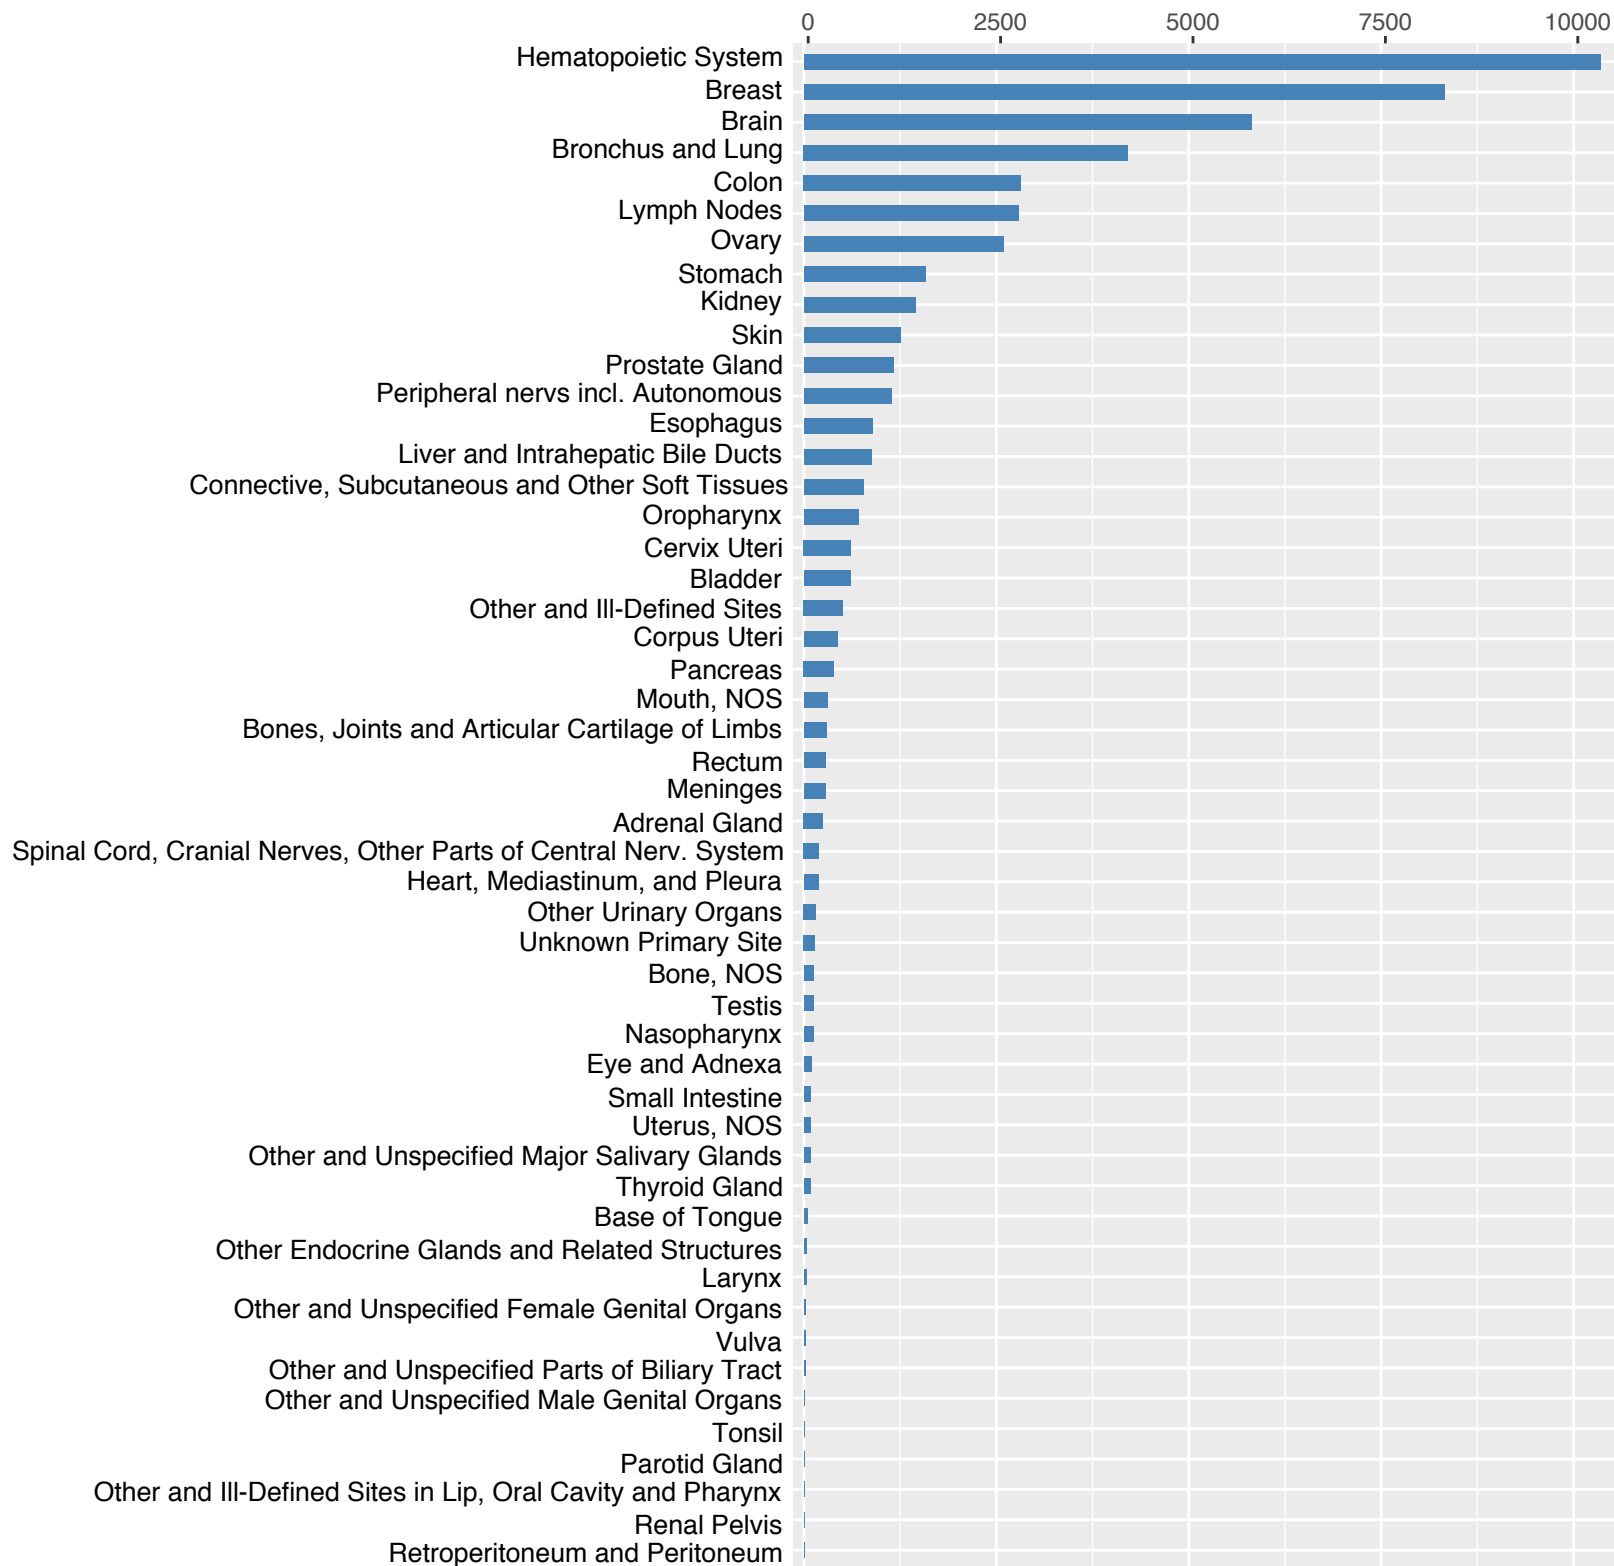

Supplement: Supplementary file 7 [file supplementary]

Number of samples in ArrayMap database

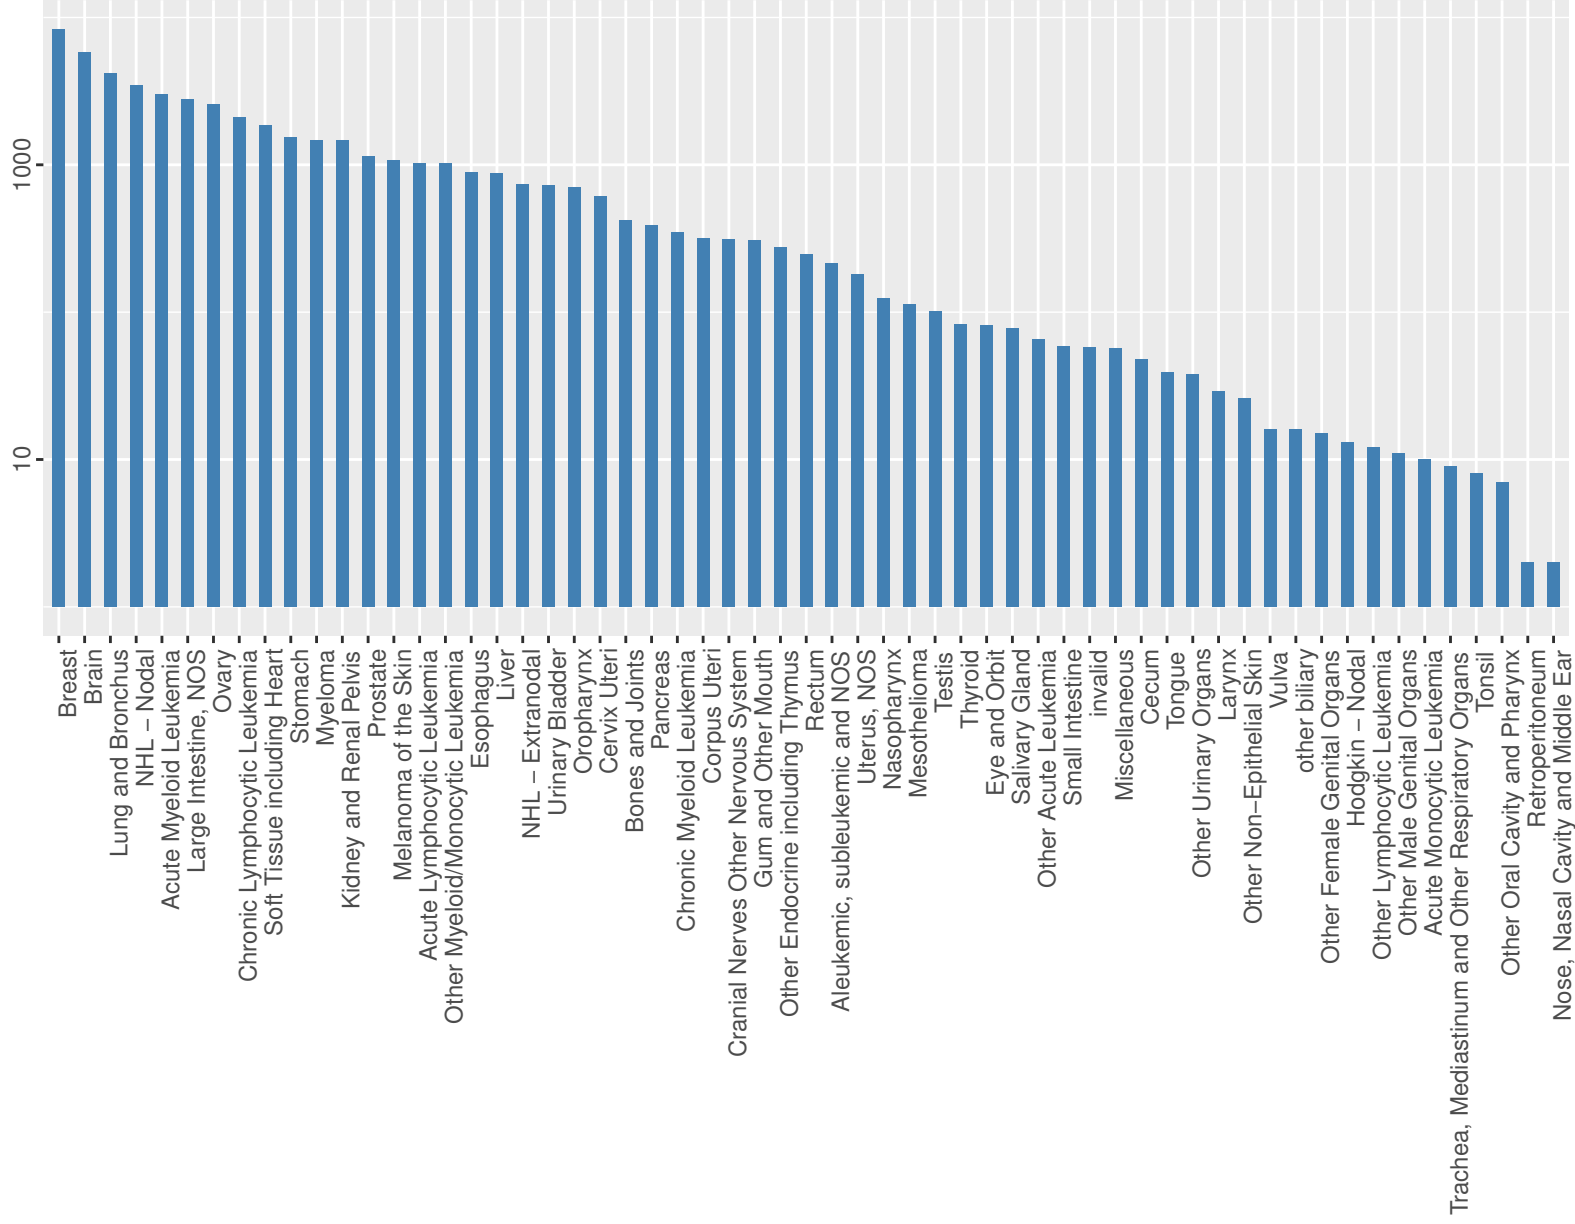

Supplement: Supplementary file 10 [file supplementary]

Number of samples in TCGA database

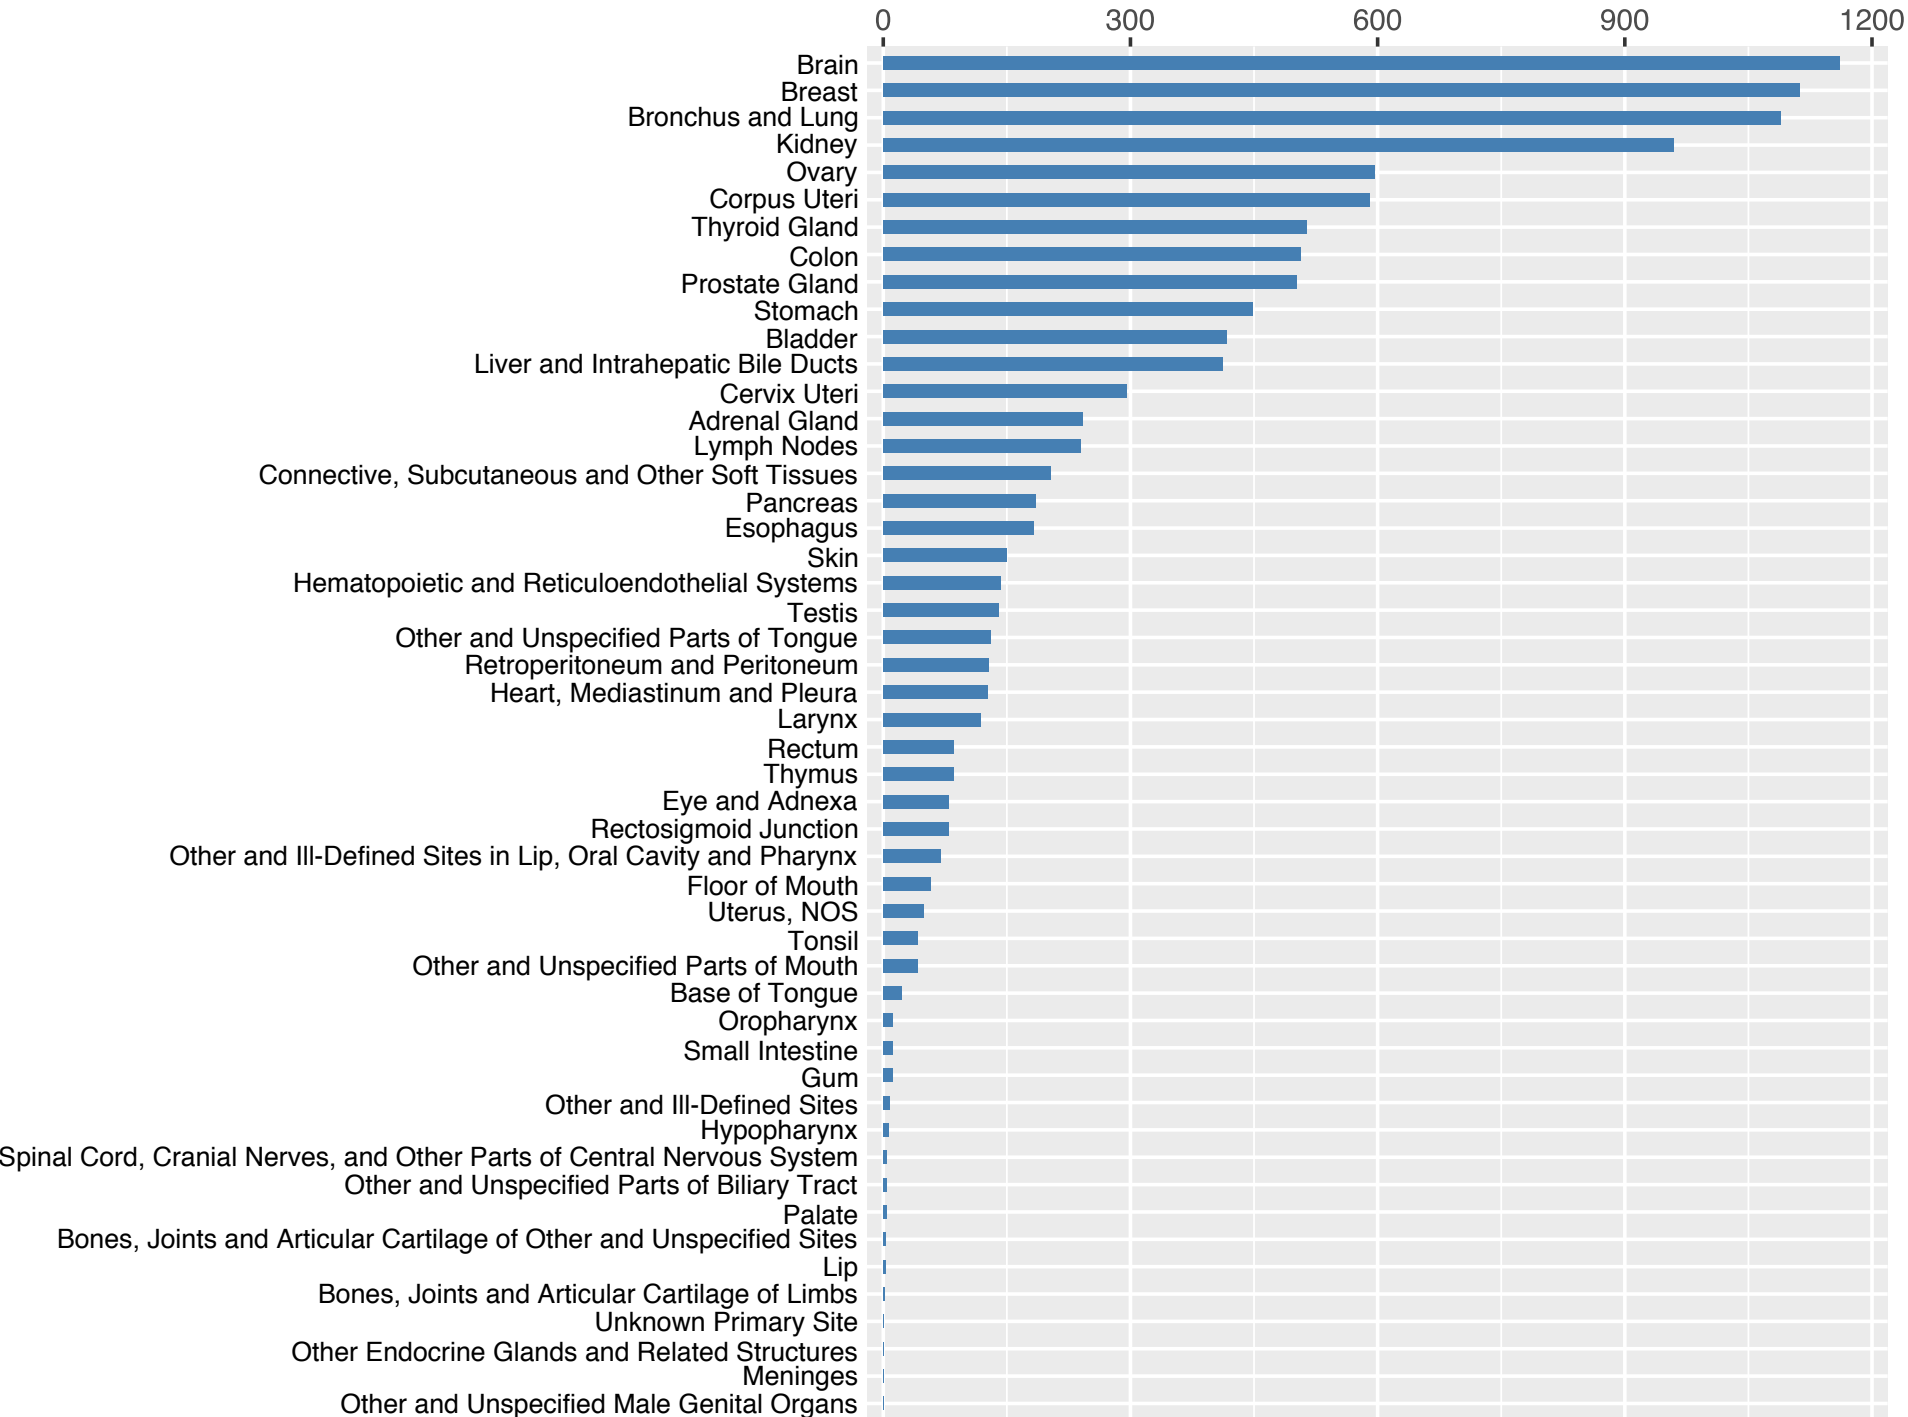

Supplement: Supplementary file 12 [file supplementary]

Number of samples in ArrayMap database

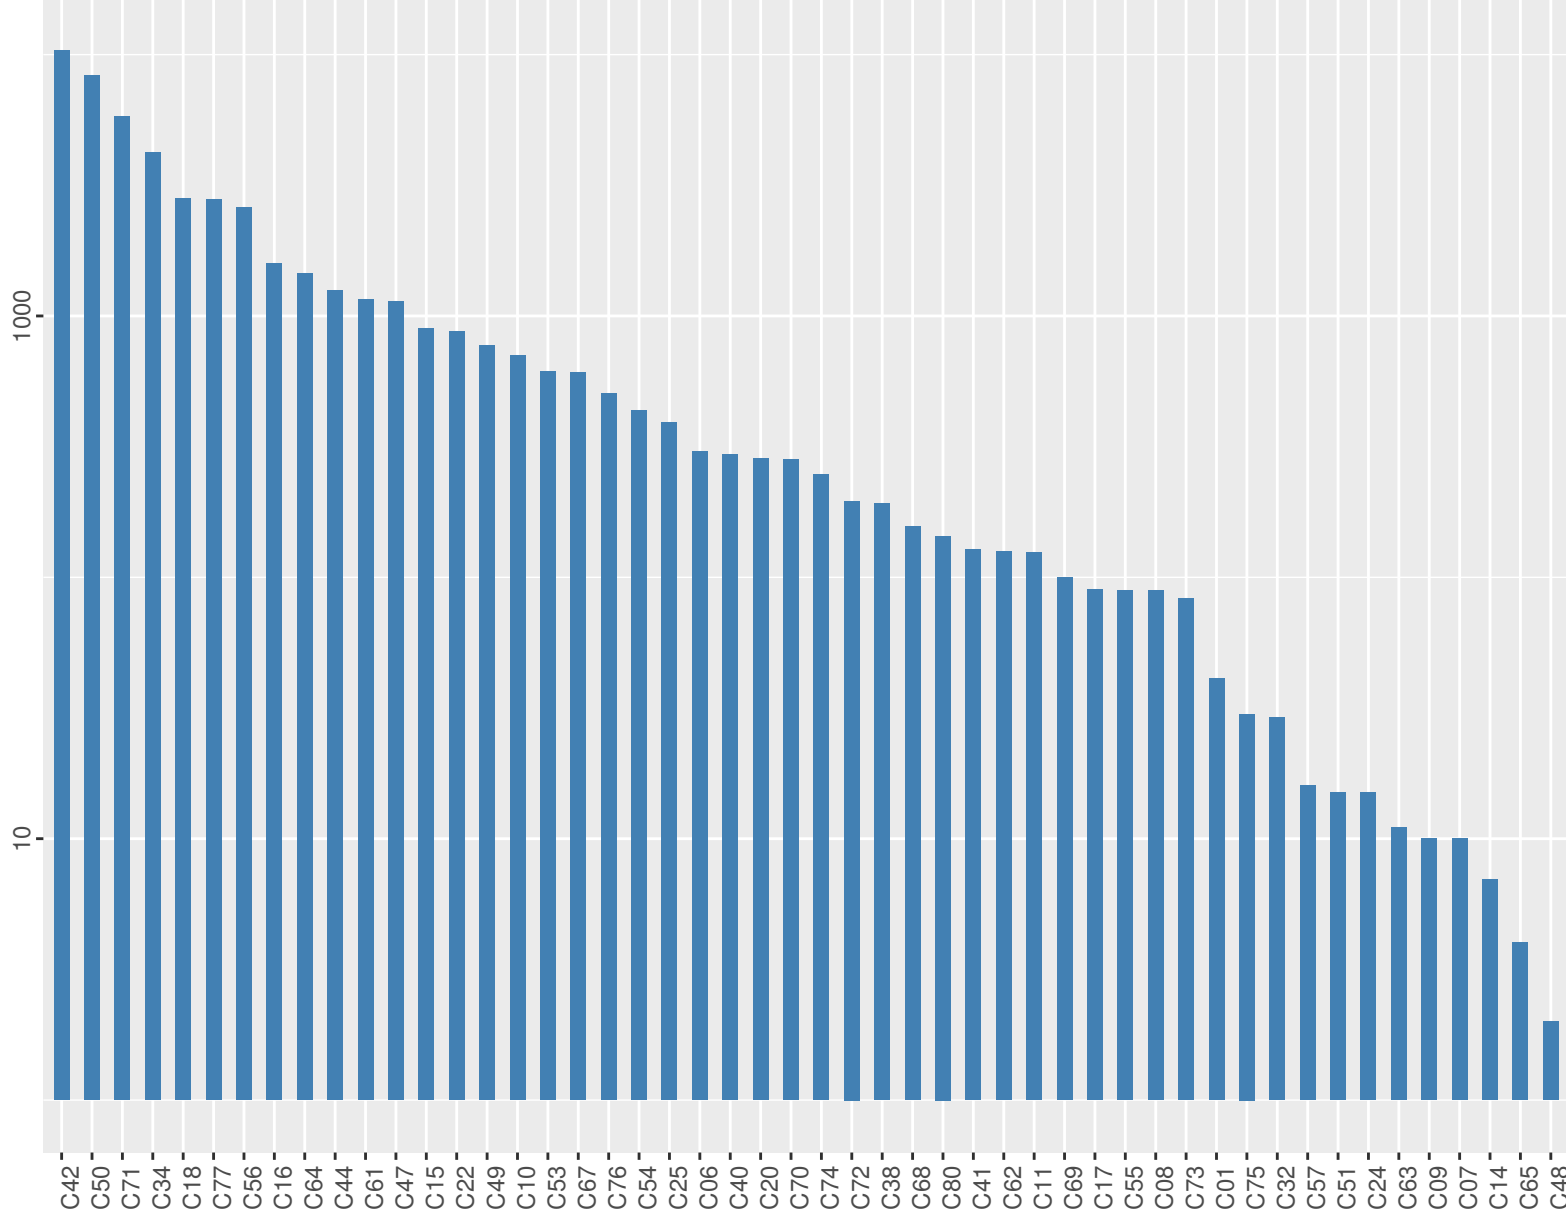

Supplement: Supplementary file 13 [file supplementary]

Number of Cancer Samples in Publication (log scale)

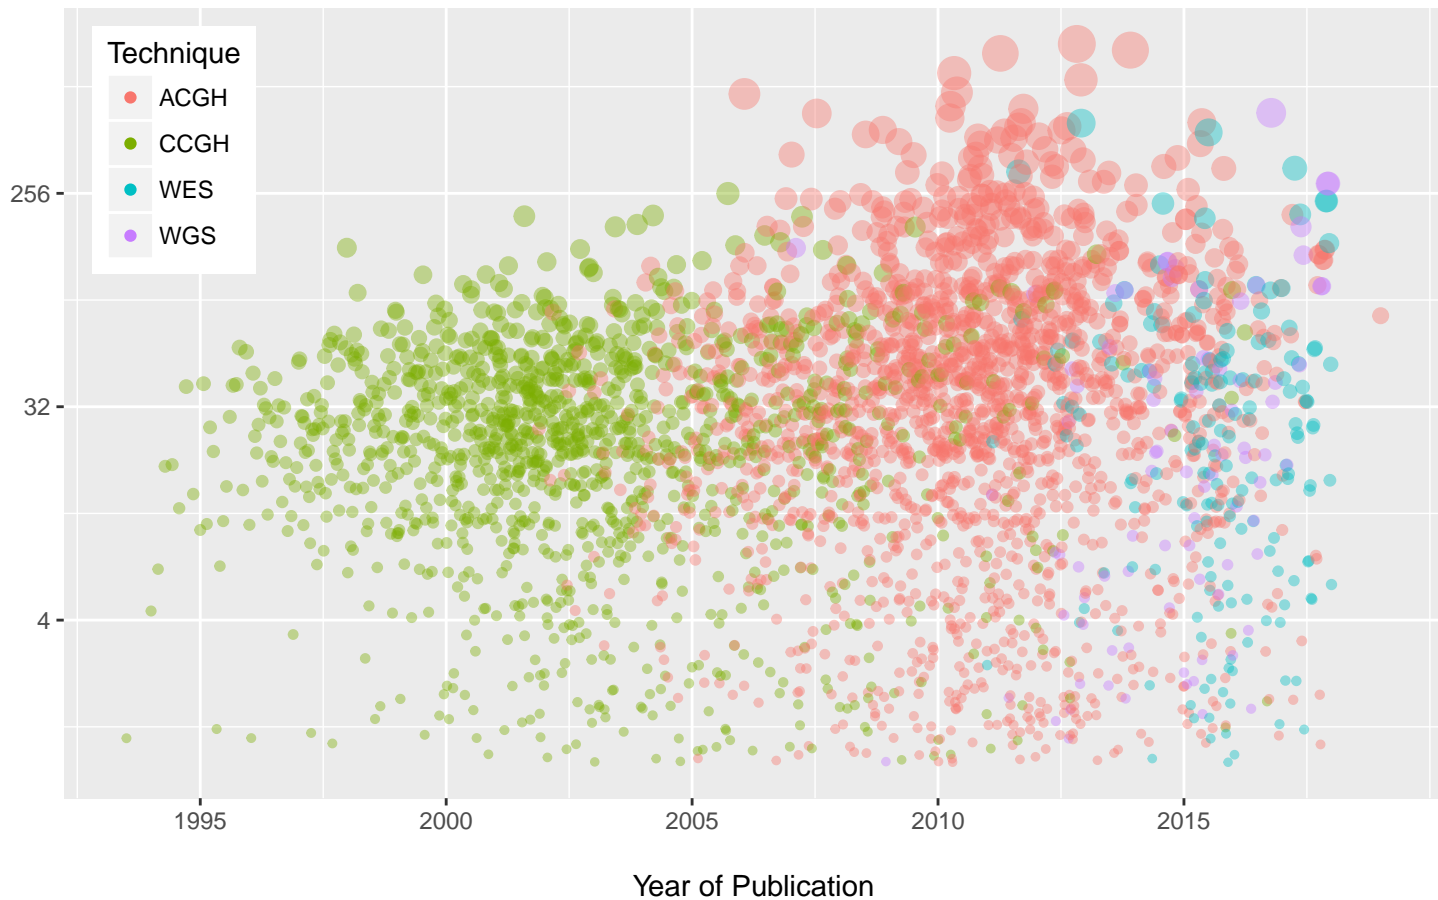

Supplement: Supplementary file 16 [file supplementary]

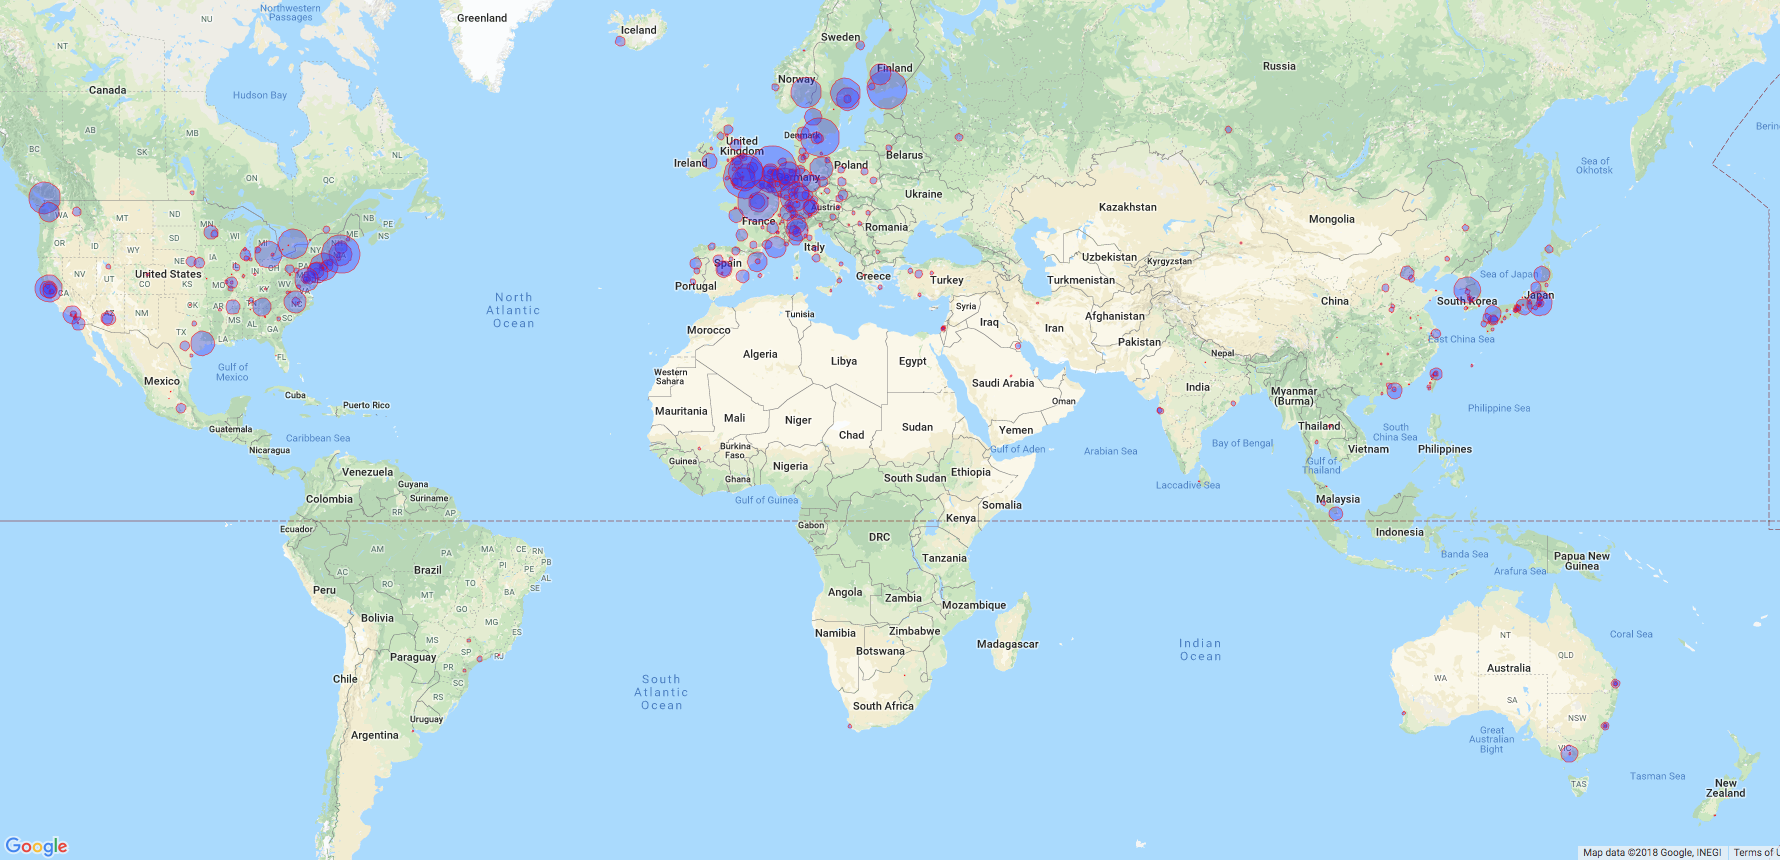

Supplement: Supplementary file 17 [file supplementary › oncogenomic_publication_landscape_LaTex_bundled/figures/publication_map.tiff]

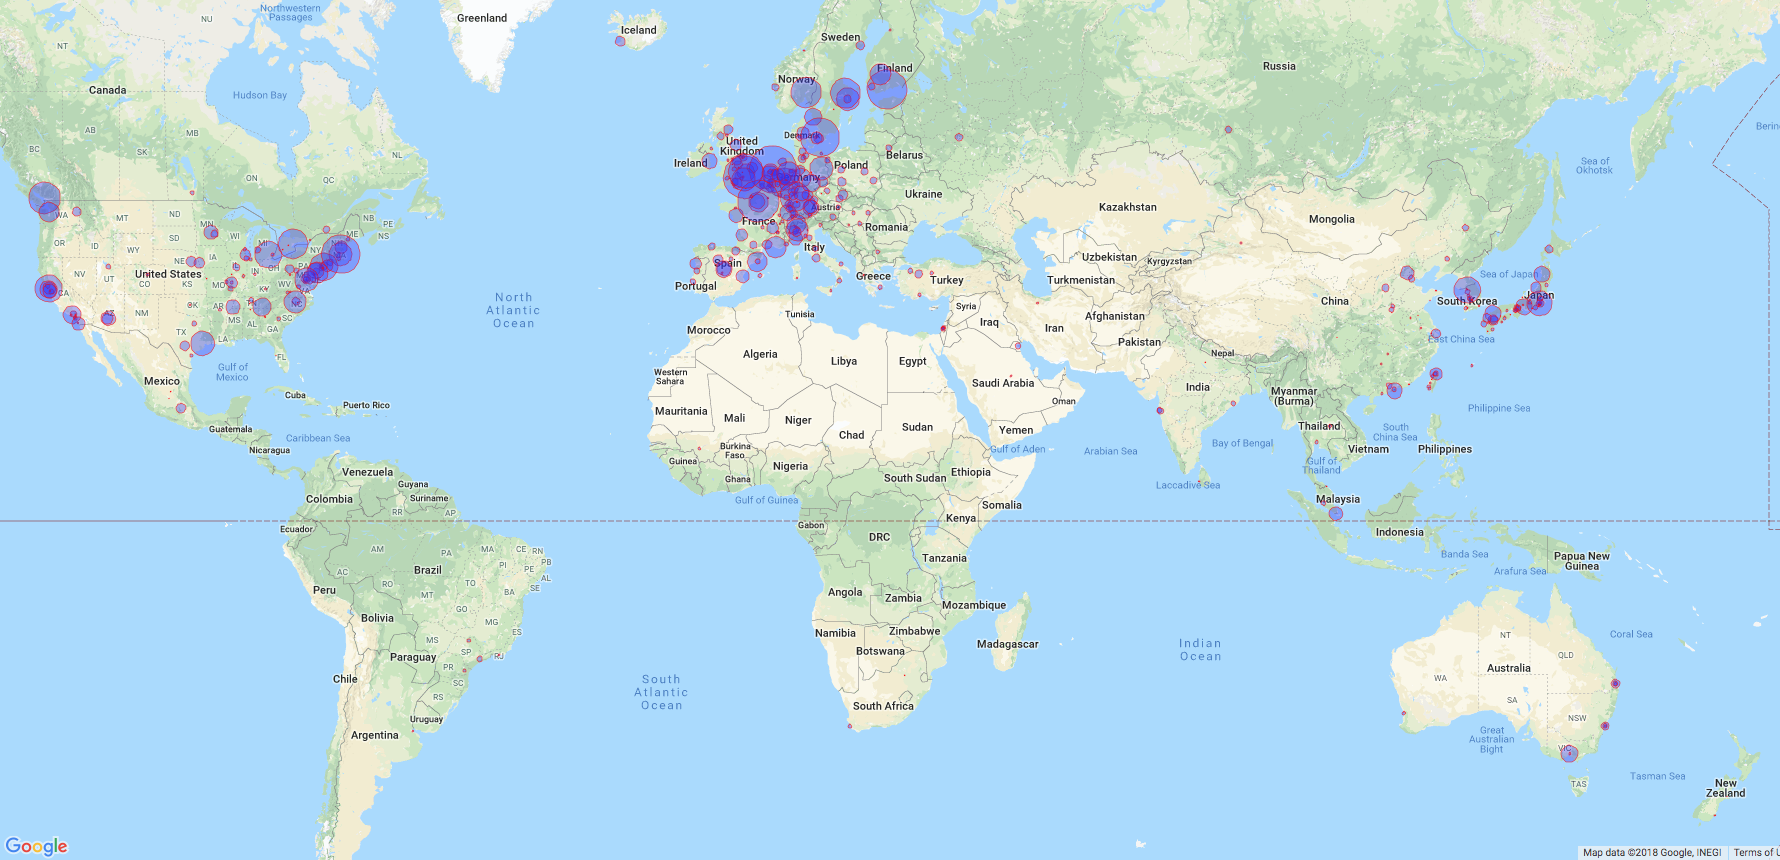

Supplement: Supplementary file 17 [file supplementary › oncogenomic_publication_landscape_LaTex_bundled/figures/publication_map.png]
